# Supplementary material for: Meristematic cell proliferation and ribosome biogenesis are decoupled in diamagnetically levitated Arabidopsis seedlings
Source: PubMed Central journal article supplement (PMC3847623; doi:10.1186/1471-2229-13-124), 2013-09-05

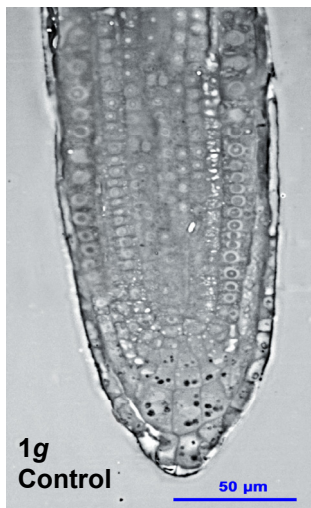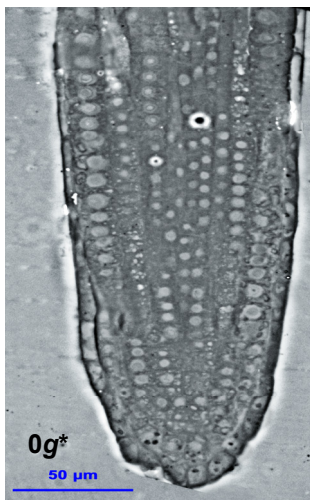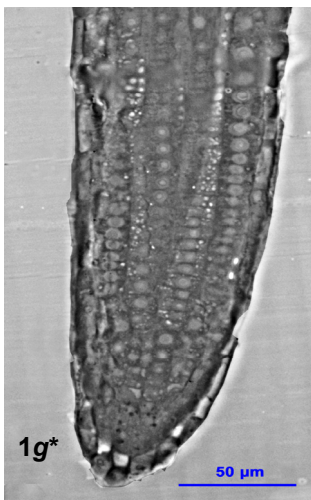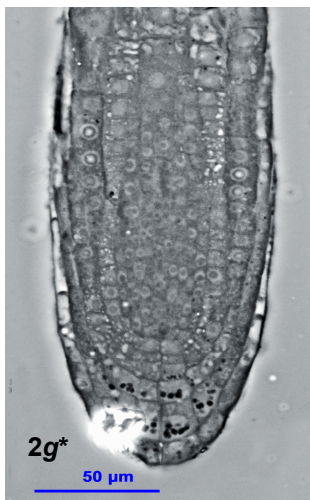

Supplement: 1471-2229-13-124-S1.pdf [file 1471-2229-13-124-S1.pdf]
